# Supplementary material
Source: PubMed Central journal article supplement (PMC11629920)
Supplement: MD-OLF-D4MD00523F-s001.pdf [file MD-OLF-D4MD00523F-s001.pdf]

## Electronic supplementary information (ESI)

### Developing peptide-based fusion inhibitors as an antiviral strategy utilizing Coronin 1 as a template

Manbit Subhadarsi Panda<sup>1#</sup>, Bushra Qazi<sup>2,3#</sup>, Vaishali Vishwakarma<sup>2#</sup>, Gourab Prasad  
Pattnaik<sup>1</sup>, Sourav Halder<sup>2,3\*</sup> and Hirak Chakraborty<sup>1,\*</sup>

<sup>1</sup>School of Chemistry, Sambalpur University, Jyoti Vihar, Burla, Odisha 768 019, India

<sup>2</sup>Division of Virus Research and Therapeutics, CSIR-Central Drug Research Institute,  
Lucknow, Uttar Pradesh, 226031, India

<sup>3</sup>Academy of Scientific and Innovative Research, Ghaziabad, Uttar Pradesh, India

## Supplementary Figures

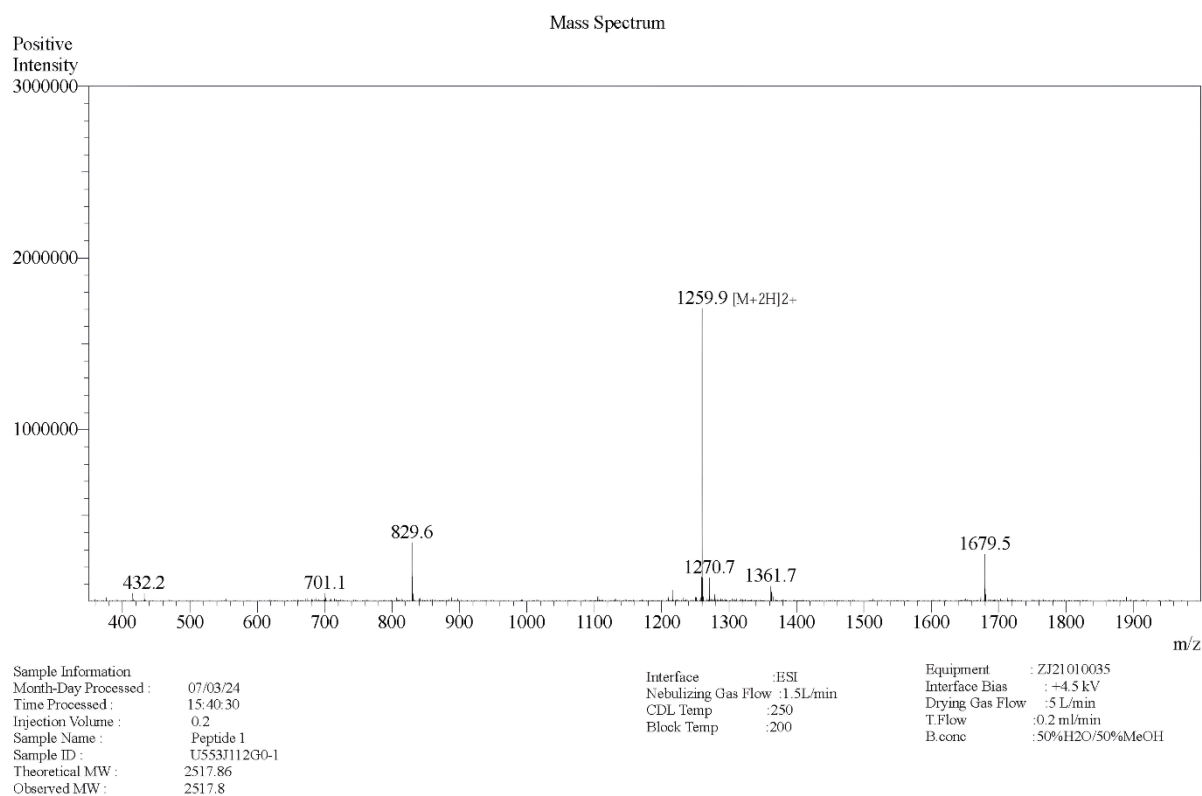

Supp. Fig. 1. Mass spectrum of mTG-23 peptide.

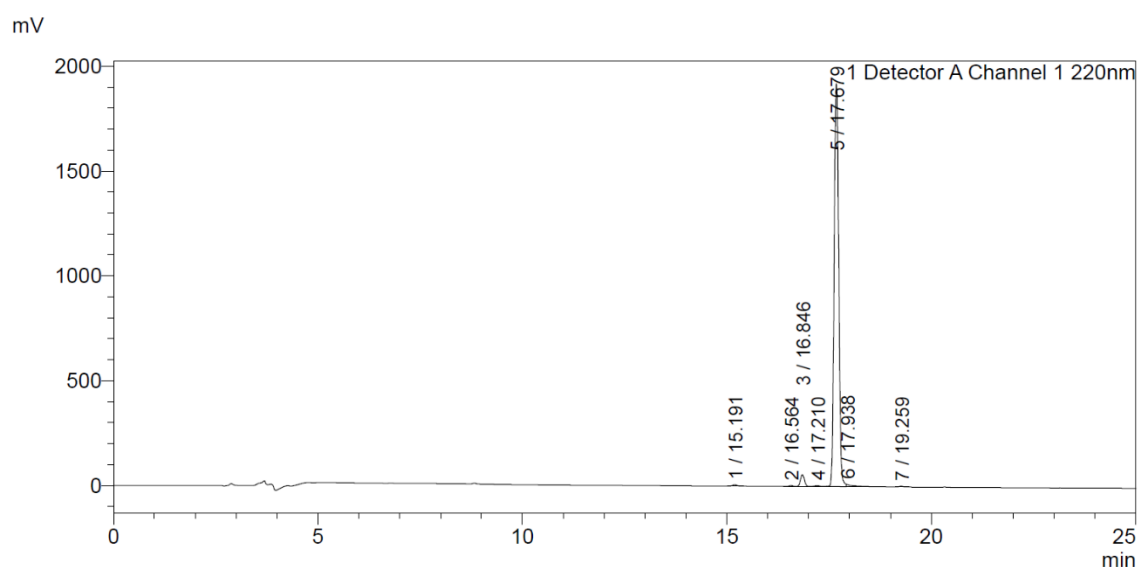

Supp. Fig. 2. HPLC profile of mTG-23 peptide. The peptide has been eluted through Inertsil ODS-SP column using 0.05% trifluoroacetic in 100% acetonitrile (v/v) as a solvent in gradient mode at 1 ml/min flow rate.

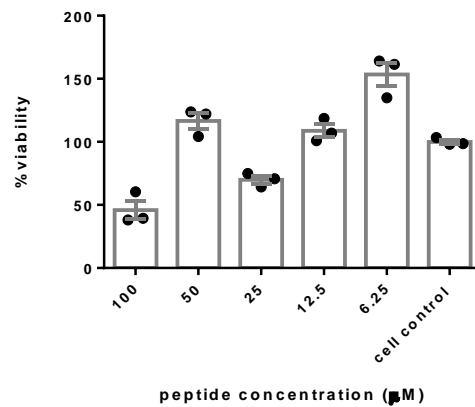

**Supp. Fig. 3.** A549 Cell viability in the presence of mTG 23. Data represent mean  $\pm$  SEM of at least 3 sets.

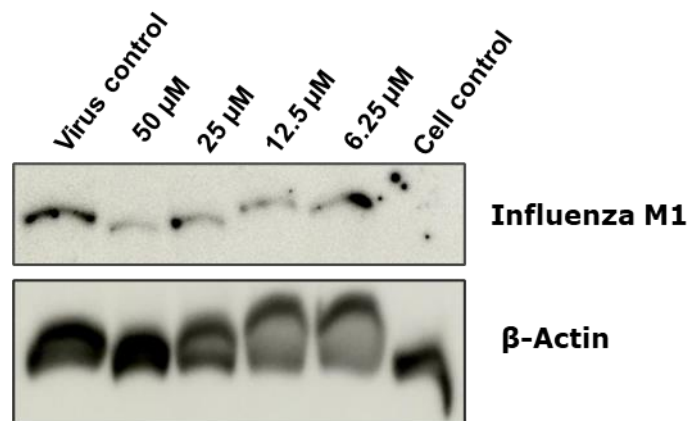

**Supp. Fig. 4.** A representative Western Blot showing the dose-dependent reduction in expression of Influenza M1 in A549 cells after 48 hours of infection in the absence and presence of varying amounts of peptide.  $\beta$ -actin was taken as a loading control.
